# Supplementary material for: Chemospecific and ligand free CuI catalysed heterogeneous N-arylation of amines with diheteroaryl halides at room temperature
Source: Royal Society of Chemistry journal article supplement (doi:10.1039/c0ob00859a), 2010-11-24

# Supporting information

## **Chemospecific and Ligand Free CuI Catalysed Heterogeneous N-Arylation of amines with diheteroaryl halides at Room Temperature.**

Sanjeev K. Verma, B.N. Acharya, and M. P. Kaushik \*

*Process Technology Development Division, Defence R & D Establishment, Jhansi Road,  
Gwalior-474002 (MP) India*

*Fax: +91(751)2340042, E-mail: mpkaushik@rediffmail.com*

### **Contents**

|                              |             |
|------------------------------|-------------|
| <b>1. General procedure</b>  | <b>2</b>    |
| <b>2. Spectroscopic data</b> | <b>2-4</b>  |
| <b>3. NMR Spectra</b>        | <b>5-19</b> |

### **General information:**

All the starting materials were obtained from commercial supplies and used as received. Ethanol and chloroform was distilled before use and used as such. Triple distilled water was used for the reaction. The reactions were performed in air atmosphere without any specific precautions. Column chromatography was performed with silica gel 200-400 mesh using chloroform and methanol as eluents. All the products of **table 2** and **3** are known compounds<sup>1-11</sup>.

### **Synthesis of Benzothiazol-2-yl-diethyl-amine (General Procedure 1).**

In a round bottom flask 0.95 gm (0.013 mol) of diethyl amine and 0.19gm (0.001 mol) of CuI was stirred for half hour. A blue colour solution was formed. To this add 0.56 gm (0.01mol) of KOH dissolved in minimum 5ml of water. Stirred it for another half hour. Orange coloured precipitate was formed. After stirring for another 30 min, 0.274 gm (0.001 mol) of tributylbenzyl ammonium choride was added followed by the addition of 1.69 gm (0.01 mol) diheteroaryl halide in 45ml chloroform. The reaction mixture was stirred for 6h at room temperature. The progress of reaction was monitored by the consumption of aryl halide. The organic layer was collected and the aqueous layer was washed with chloroform (3 x 25ml). The combined organic layer is dried over anhydrous Na<sub>2</sub>SO<sub>4</sub> and solvent was evaporated at reduced pressure. Products were purified either by crystallizing or by flash chromatography.

### **2-Piperazin-1-yl-benzothiazole (General Procedure 2)**

In a round bottom flask 1.12 gm (0.013 mol) of piperazine and 0.19gm (0.001 mole) CuI in water (5ml) was stirred for 30 min. 0.56 gm (0.01mol) of KOH was added in it and stirred for another 30 min. After stirring 0.274 gm (0.001 mol) of tributylbenzyl ammonium choride was added. The reaction mixture was stirred for 30 min and then 1.69 gm (0.01 mol) diheteroaryl halide in 45ml ethanol was added in reaction mixture. The reaction mixture was stirred for 6h at room temperature. The progress of reaction was monitored by the consumption of aryl halide. After completion of the reaction the ethanol was evaporated in vacuum and the aqueous layer was washed with chloroform (3 x

25ml). The combined organic layer is dried over anhydrous Na<sub>2</sub>SO<sub>4</sub> and solvent was evaporated at reduced pressure. Products were purified either by crystallizing or by flash chromatography.

### **Benzothiazol-2-yl-dimethyl-amine<sup>1,2</sup>**

White crystalline solid; mp 84-86 °C; <sup>1</sup>H NMR (400 MHz, CDCl<sub>3</sub>): δ 3.192 (s, 6H), 7.06 (t, 1H), 7.28 (t, 1H), 7.57 (t, 2H); <sup>13</sup>C NMR (100 MHz, CDCl<sub>3</sub>): δ 40.19, 118.80, 120.6, 120.9, 125.93, 131.51, 153.28, 168.79 HRMS (ESI, MeOH): *m/z* 179 [M +H]<sup>+</sup>;

### **Benzothiazol-2-yl-diethyl-amine<sup>3</sup>**

Colourless liquid; <sup>1</sup>H NMR (400 MHz, CDCl<sub>3</sub>): δ 1.275 (t, 6H), 3.57 (t, 4H), 7.01 (t, 1H), 7.25 (t, 1H), 7.57 (t, 2H); <sup>13</sup>C NMR (100 MHz, CDCl<sub>3</sub>): δ 12.89, 45.39, 118.53, 120.53, 125.81, 153.34, 167.34; HRMS (ESI, MeOH): *m/z* 206[M +H]<sup>+</sup>;

### **2-Pyrrolidin-1-yl-benzothiazole<sup>4,5</sup>**

White crystalline solid; mp 96-98 °C; <sup>1</sup>H NMR (400 MHz, CDCl<sub>3</sub>) δ 2.07 (p, 4H), 3.59 (t, 4H), 7.04 (t, 1H), 7.3 (t, 1H) 7.5(m, 2H); <sup>13</sup>C NMR (100 MHz, CDCl<sub>3</sub>): δ 24.02, 49.48, 118.70, 120.65, 125.90, 130.77, 152.2, 164.22 ; HRMS (ESI, MeOH): *m/z* 204. [M +H]<sup>+</sup>;

### **2-Morpholin-4-yl-benzothiazole<sup>6</sup>**

White crystalline solid; mp 118-120 °C; <sup>1</sup>H NMR (400 MHz, CDCl<sub>3</sub>): δ 3.63.(t, 4H), 3.85 (t, 4H), 7.12 (t, 1H), 7.31 (t, 1H), 7.61(t, 2H); <sup>13</sup>C NMR (100 MHz, CDCl<sub>3</sub>): δ 48.12, 66.26, 119.34, 120.79, 121.71, 126.12, 129.07, 129.33, 130.56, 150.12, 168.20; HRMS (ESI, MeOH): *m/z* 221 [M +H]<sup>+</sup>;

### **2-Morpholin-6-chloro-4-yl-benzothiazole<sup>6</sup>**

White crystalline solid; mp 110-112 °C; <sup>1</sup>H NMR (400 MHz, CDCl<sub>3</sub>): δ 3.61 (t 4), 3.84 (t, 4H), 7.27 (m, 1H), 7.45(d, 2H), 7.58(d, 2H) ; <sup>13</sup>C NMR (100 MHz, CDCl<sub>3</sub>):δ 48.47,

66.19,119.95,120.46,126.58, 126.78, 131.77, 151.18, 169.04; HRMS (ESI, MeOH):  $m/z$  255.5  $[M + H]^+$ ;

#### **2-Morpholin-6-nitro-4-yl-benzothiazole<sup>6</sup>**

Yellow Solid; mp decompose after 200°C; <sup>1</sup>H NMR (400 MHz, CDCl<sub>3</sub>): δ 3.74 (t 4), 3.88 (t, 4H), 7.50 (d, 1H), 8.2 (d,d, 1H), 8.54 (d, 1H) ; <sup>13</sup>C NMR (100 MHz, CDCl<sub>3</sub>):δ 48.69, 65.90,118.30,118.69, 122.85, 131.279, 141.34, 158.34, 172.91; HRMS (ESI, MeOH):  $m/z$  265  $[M + H]^+$ .

#### **2-Morpholin-4-yl-1H-benzoimidazole<sup>6</sup>**

White crystalline solid; mp 117-119 °C; <sup>1</sup>H NMR (400 MHz, CDCl<sub>3</sub>): δ 2.17 s, 1H, NH), 3.61 (t, 4H), 3.84 (t, 4H), 7.25 (m, 2H), 7.45(d, 1H) 7.58(d, 1H) ; <sup>13</sup>C NMR (100 MHz, CDCl<sub>3</sub>): δ 51.75, 119.00, 124.31, 129.82, 139.62, 155.31, 170.12; HRMS (ESI, MeOH):  $m/z$  204  $[M + H]^+$ .

#### **4-Thiazol-2-yl-morpholine<sup>6</sup>**

Pale yellow liquid; <sup>1</sup>H NMR (400 MHz, CDCl<sub>3</sub>): δ 3.46 (t 4), 3.83 (t, 4H), 6.61 (d, 1H), 7.22 (d, 1H); <sup>13</sup>C NMR (100 MHz, CDCl<sub>3</sub>):δ 48.73, 66.16, 107.72, 139.41; HRMS (ESI, MeOH):  $m/z$  171  $[M + H]^+$ .

#### **Benzothiazol-2-yl-benzyl-amine<sup>7</sup>**

White crystalline solid; mp 176-178 °C; <sup>1</sup>H NMR (400 MHz, CDCl<sub>3</sub>): 4.79(s, 2H), 7.08(t, 1H), 7.28-7.42 (m, 6H), 7.55 (m, 2H); <sup>13</sup>C NMR (100 MHz, CDCl<sub>3</sub>): δ 25.34, 25.44, 30.88, 47.20, 50.94, 155.90, 171.01; HRMS(ESI, MeOH):  $m/z$  calcd. 241 $[M + H]^+$ .

#### **(4-Amino-benzyl)-benzothiazol-2-yl-amine<sup>7</sup>**

White crystalline solid; mp decompose after 230 °C; <sup>1</sup>H NMR (400 MHz, CDCl<sub>3</sub>): δ 4.37 (d, 2H, NH<sub>2</sub>), 5.0 (s, 2H), 6.52 (d, 2H) 7.03(d, 2H), 7.2(t, 1H), 7.4(d, 1H) 7.6(d, 1H), 8.3(t, 1H); <sup>13</sup>C NMR (100 MHz, CDCl<sub>3</sub>): δ; HRMS (ESI, MeOH):  $m/z$  256  $[M + H]^+$ .

### **2-Piperazin-1-yl-benzothiazole<sup>9-11</sup>**

White crystalline solid; mp 54 °C, <sup>1</sup>H NMR (400 MHz, CDCl<sub>3</sub>): δ 1.68 (s, 1H, NH), 2.1 (p, 4H), 3.6 (t, 4H), 7.02 (t, 3H), 7.28 (t, 3H), 7.57(d-d, 2H); <sup>13</sup>C NMR (100 MHz, CDCl<sub>3</sub>): δ 45.65, 49.66, 119.22, 120.81, 121.51, 126.12, 130.74, 152.86, 169.21; HRMS (ESI, MeOH): m/z. 220 [M +H]<sup>+</sup>.

### **6-Chloro-2-piperazin-1-yl-benzothiazole<sup>9,10</sup>**

White crystalline solid; <sup>1</sup>H NMR (400 MHz, CDCl<sub>3</sub>): δ 1.74 (s, 1H, NH), 3.0 (t, 4H), 3.59 (t, 4H), 7.2 (d-d, 1H), 7.4(d, 1H), 7.56(d, 1H); <sup>13</sup>C NMR (100 MHz, CDCl<sub>3</sub>): δ 38.99, 45.49, 119.70, 120.36, 126.43, 126.44, 131.81, 151.40, 169.12; HRMS(ESI, MeOH): m/z 254 [M +H]<sup>+</sup>;

### **1-Thiazol-2-yl-piperazine<sup>9</sup>**

Colourless Liquid; <sup>1</sup>H NMR (400 MHz, CDCl<sub>3</sub>): δ 1.97(s, 1H, NH), 2.9 (t, 4H), 3.45 (t, 4H), 6.58 (d 1H), 7.19 (d, 1H); <sup>13</sup>C NMR (100 MHz, CDCl<sub>3</sub>): δ 44.01, 47.22, 108.12, 141.02, 174 HRMS(ESI, MeOH): m/z 170 [M +H]<sup>+</sup>.

### **2-Piperazin-1-yl-1H-benzoimidazole<sup>12, 13.</sup>**

White crystalline solid; <sup>1</sup>H NMR (400 MHz, DMSO-d<sub>6</sub>): δ 2.4-3.1 (b, 8H), 6.9 (m, 2H), 7.16 (m 2H); <sup>13</sup>C NMR (100 MHz, CDCl<sub>3</sub>): δ 25.34, 25.44, 30.88, 47.20, 50.94, 155.90, 171.01; HRMS(ESI, MeOH): m/z 203 [M +H]<sup>+</sup>.

### **References.**

1. A.I. Khalaf, R.G. Alvarez, C.J. Suckling, R. D. Waigh, *Tetrahedron*, **2000**, 56 8567.
2. J. T. Gupton, J. P. Idoux, G. Baker, C. Colon, A. D. Crews, C. D. Jurss, R. C. Rampi, *J. Org. Chem.* **1983**, 48, 2933.
3. K. Matsumoto, S. Hashimoto, S. Otani, *J. Chem. Soc., Chem. Commun.* **1991**, 306.
4. S. Claude, R. Tabacchi, L. Duc, R. Fuchs, K. Boosen, *Helv. Chim. Acta* **1980**, 63 (3), 682.

5. K. Walczynski, R. Guryn, O. P. Zuiderveld, H. Timmerman, *Archiv der Pharmazie*, **1999**, 11, 389.
6. L. L. Joyce, R. A. Batey. *Org. Lett.* **2009**, 11, 2792.
7. G. Shen, X. Lv, W. Bao *Eur. J. Org. Chem.* **2009**, 34, 5987 .
8. P. Saha, T. Ramana, N. Purkait, M. A. Ali, R. Paul, and T. Punniyamurthy. *J. Org. Chem.* **2009**, 74, 8719.
9. B. T. Kim, Y. K. Min, J. N. Heo, H. Lee, N. K. Park, S. Y. Chang, S. W. Song, J. J. Oh. *US patent application* No. 20100144712, **2009**.
10. J. P. Yevich, J.S. New, D. W. Smith, W.G. Lobeck, J.D. Catt, J.L. Minielli, M. S. Eison, D.P. Taylor, L. A. Riblet, D.L. Temple., *J. Med. Chem.* **1986**, 29, 359.
11. O. Diouf, P. Depreux, D. Lesieur, J.H. Poupaert, D. H. Caignard, *Eur. J. Med. Chem.* **1995**, 30, 715.
12. A. Morreale, E. G. Ivez-Ruano, I. Iriepa-Canalda, D B. Boyd, *J. Med. Chem.* **1998**, 41, 2029.
13. A.Orjales, R. Mosquera, L. Labeaga, R.Rodes, *J. Med. Chem.* **1998**, 40, 586

**<sup>1</sup>H NMR of Benzothiazol-2-yl-dimethyl-amine (CDCl<sub>3</sub>)**

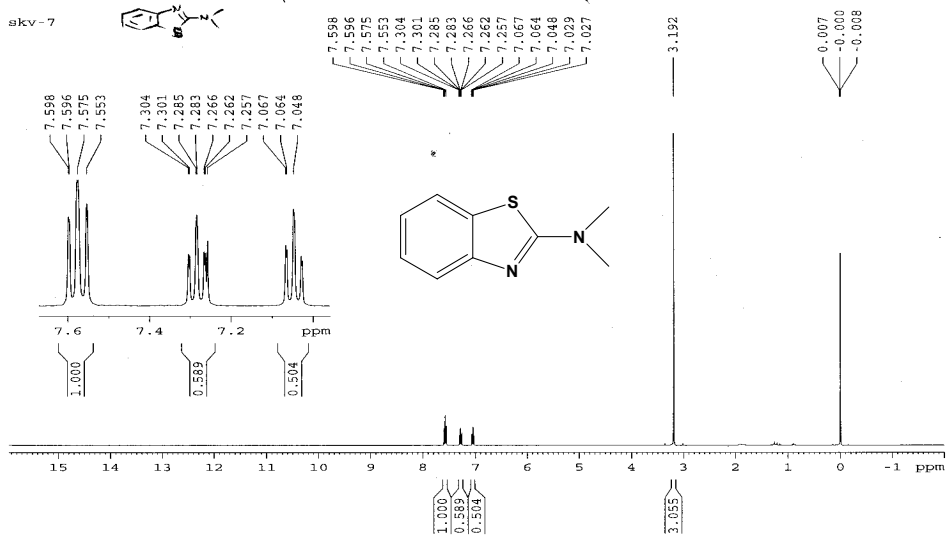

**<sup>13</sup>C NMR of Benzothiazol-2-yl-dimethyl-amine (CDCl<sub>3</sub>)**

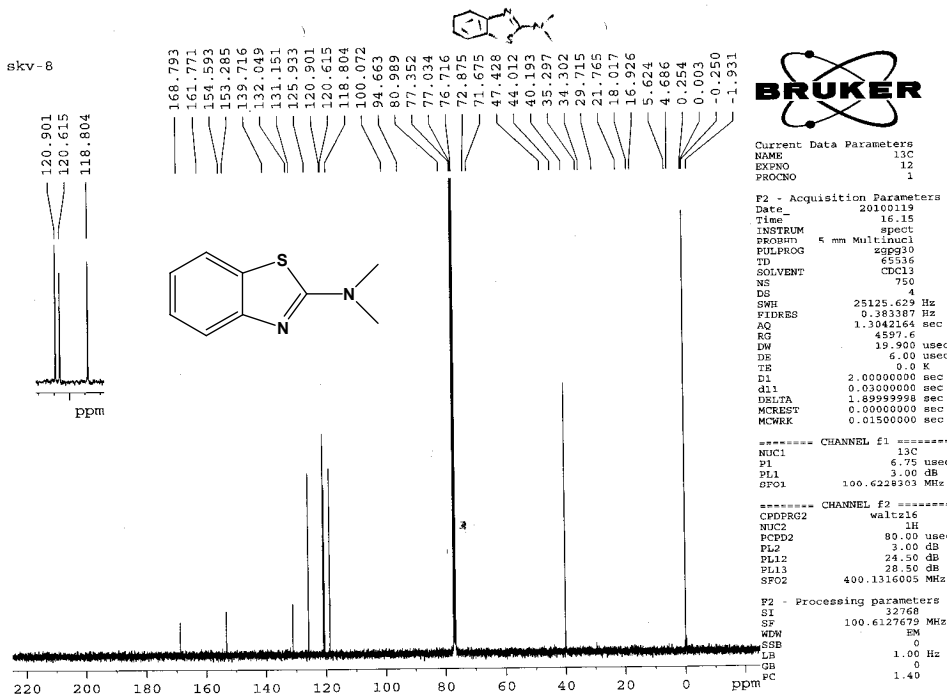

# <sup>1</sup>H NMR of Benzothiazol-2-yl-diethyl-amine (CDCl<sub>3</sub>)

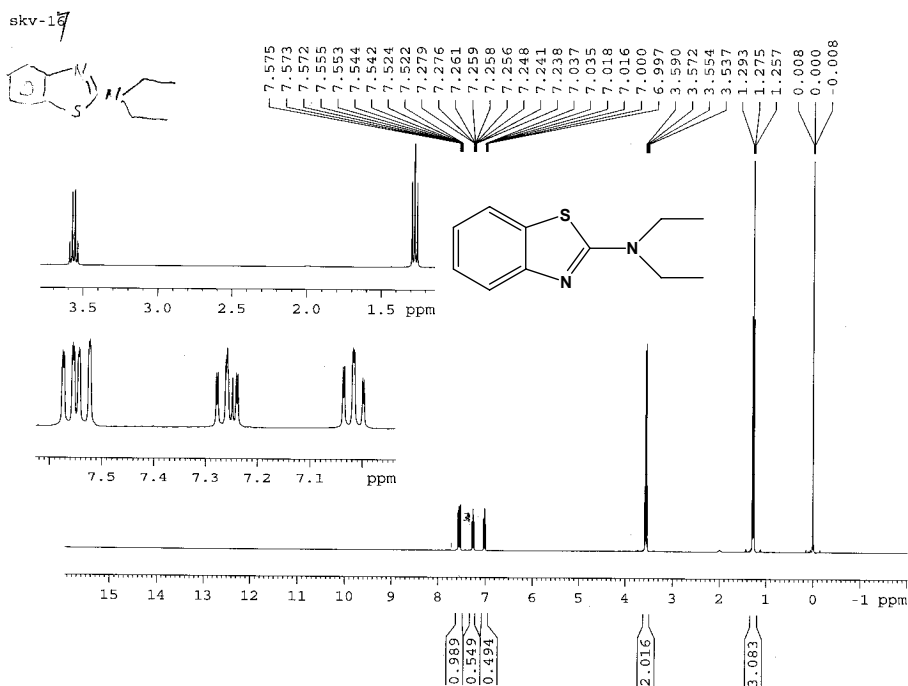

# <sup>13</sup>C NMR of Benzothiazol-2-yl-diethyl-amine (CDCl<sub>3</sub>)

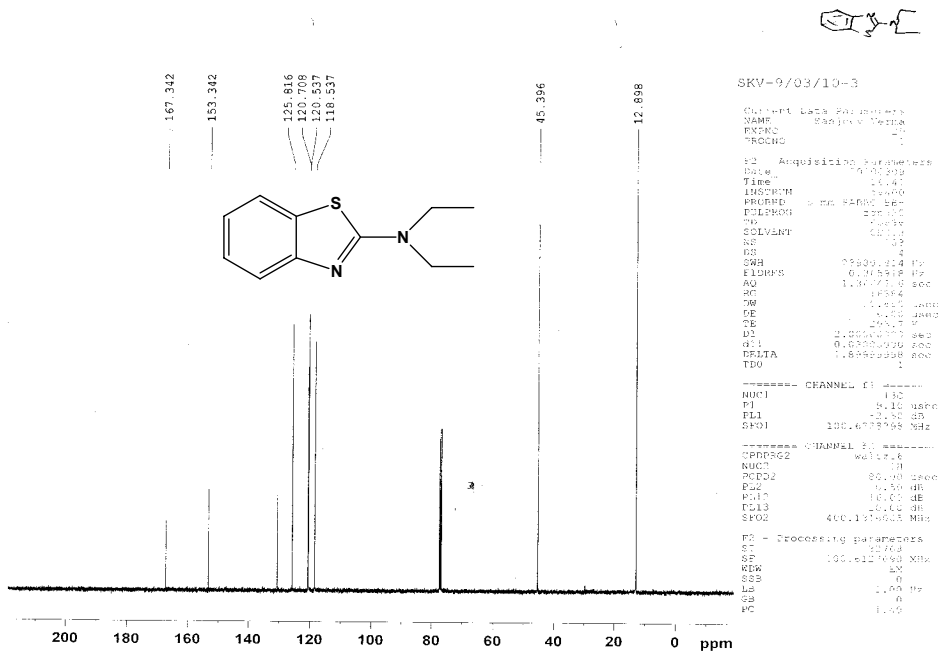



<sup>1</sup>H NMR of 2-Pyrrolidin-1-yl-benzothiazole (CDCl<sub>3</sub>)

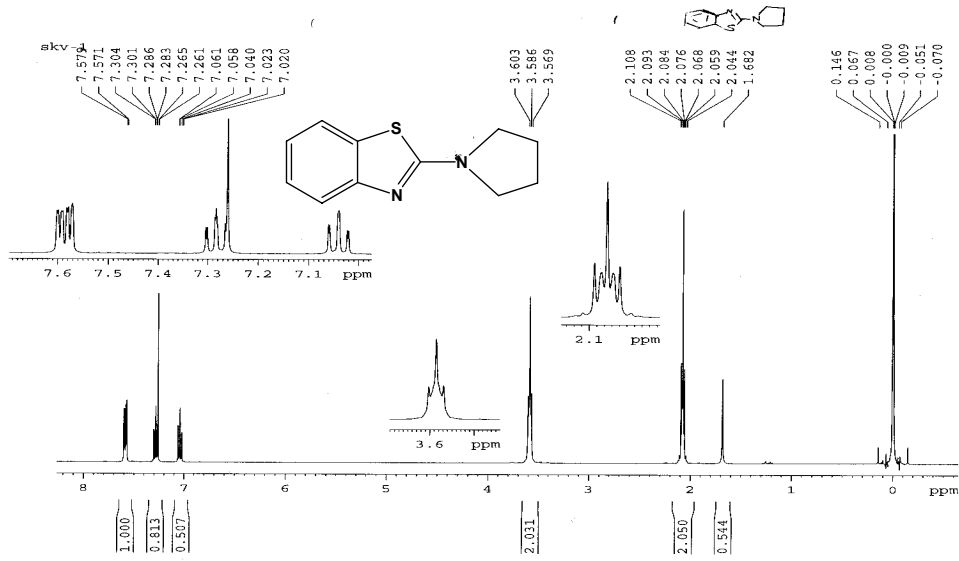

<sup>13</sup>C NMR of 2-Pyrrolidin-1-yl-benzothiazole (CDCl<sub>3</sub>)

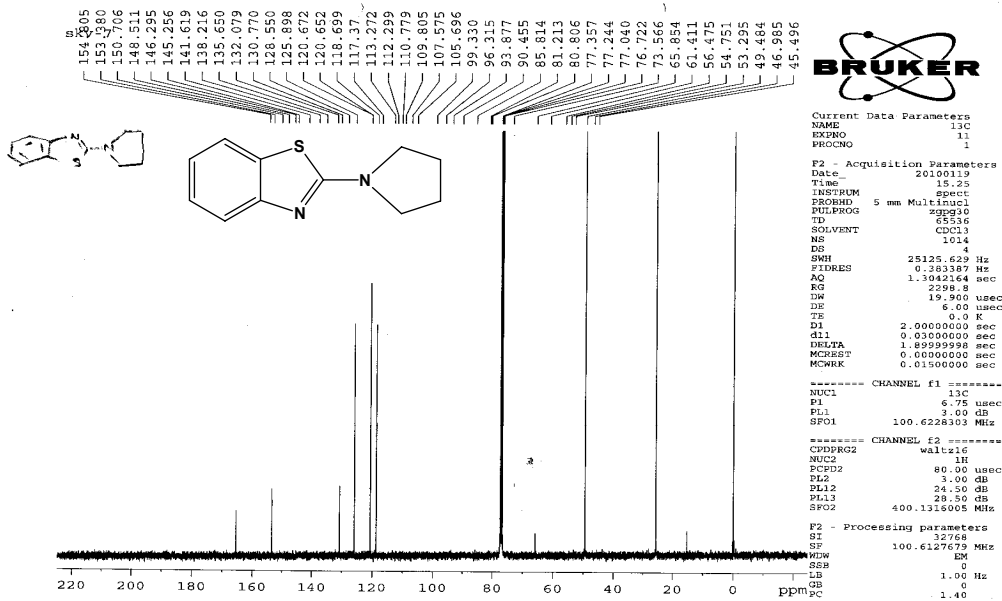

### <sup>1</sup>H NMR of 2-Morpholin-4-yl-benzothiazole (CDCl<sub>3</sub>)

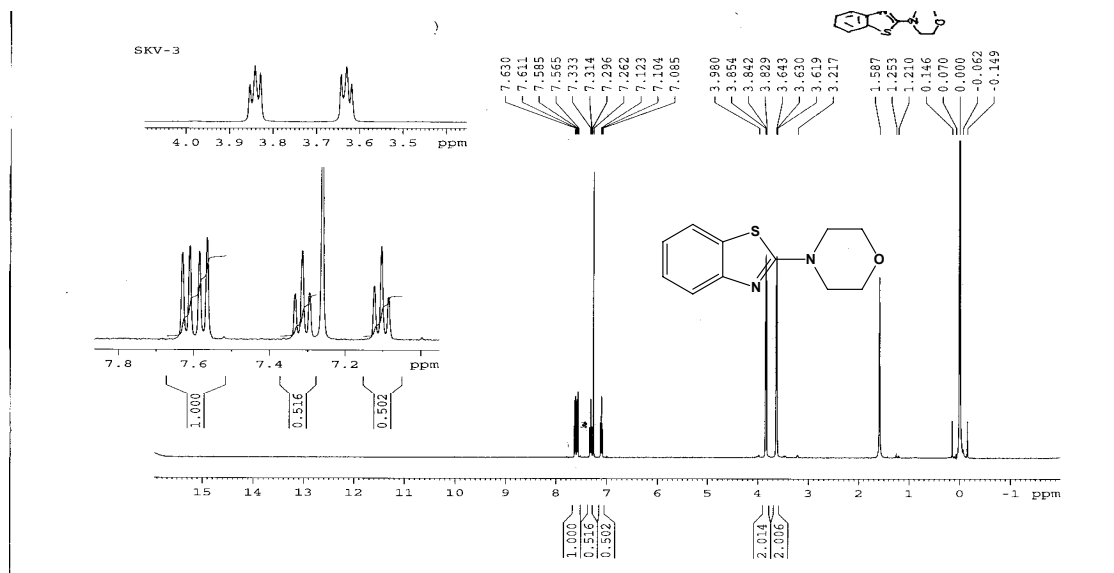

### <sup>13</sup>CNMR of 2-Morpholin-4-yl-benzothiazole (CDCl<sub>3</sub>)

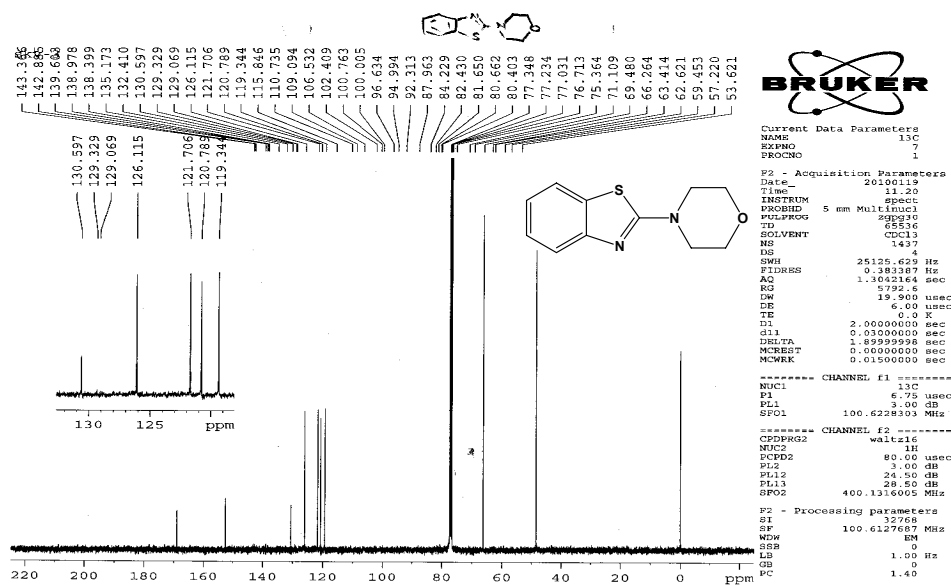

### <sup>1</sup>H NMR of 2-Morpholin-6-chloro-4-yl-benzothiazole (CDCl<sub>3</sub>)

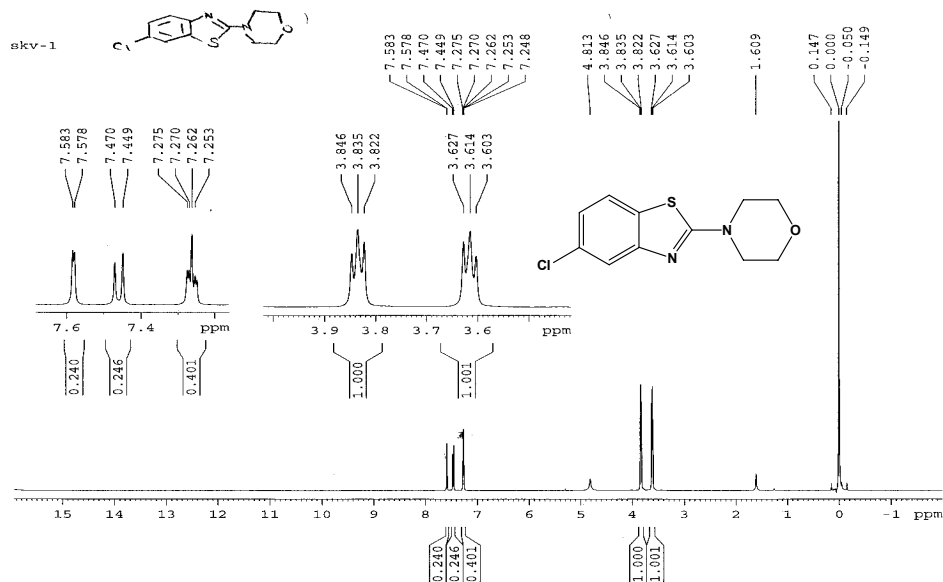

### <sup>13</sup>CNMR of 2-Morpholin-6-chloro-4-yl-benzothiazole (CDCl<sub>3</sub>)

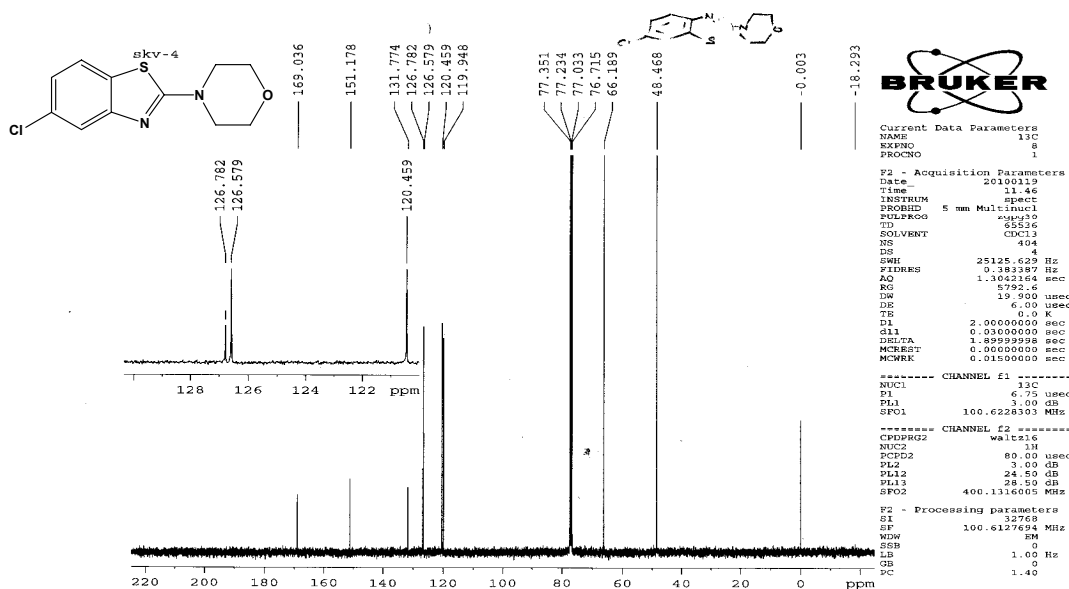

# <sup>1</sup>H NMR of 2-Morpholin-6-nitro-4-yl-benzothiazole (CDCl<sub>3</sub>)

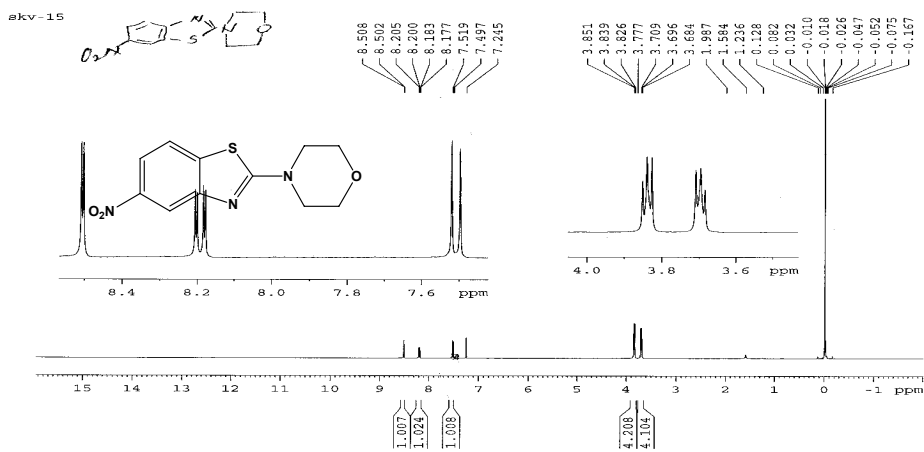

# <sup>13</sup>C NMR of 2-Morpholin-6-nitro-4-yl-benzothiazole (DMSO-d<sub>6</sub>)

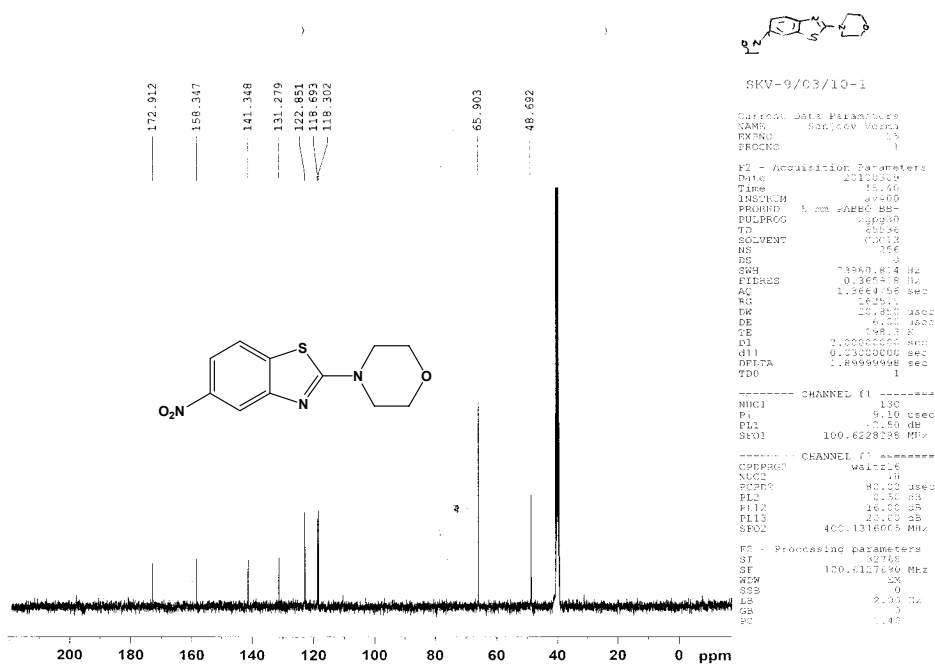

<sup>1</sup>H NMR of 4-Thiazol-2-yl-morpholine (CDCl<sub>3</sub>)

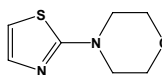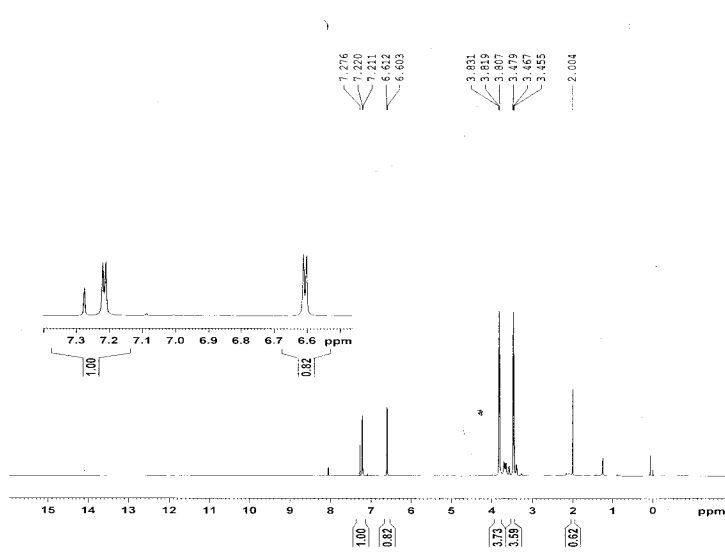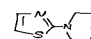

SKV2

```
Current Data Parameters
NAME      Sanjeev Verma
EXPNO    19
PROCNO   1

F2 - Acquisition Parameters
Date_    20100205
Time     15.56
INSTRUM  avco
PROBHD   5 mm PABBO BB-
PULPROG  zg30
TD       65536
SOLVENT  CDCl3
NS       16
DS       2
SWH      8278.146 Hz
FIDRES   0.126314 Hz
AQ       3.9584243 sec
RG       114
DW       60.400 usec
DE       6.00 usec
TE       292.1 K
D1       1.0000000 sec
TD0      1

===== CHANNEL f1 =====
NUC1     1H
P1       12.50 usec
PL1     -0.50 dB
SFO1    400.1324710 MHz

F2 - Processing parameters
SI       32768
SF      400.1300035 MHz
WDW      EM
SSB      0
LB       0.30 Hz
GB       0
PC       1.00
```

<sup>13</sup>C NMR of 4-Thiazol-2-yl-morpholine (CDCl<sub>3</sub>)

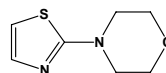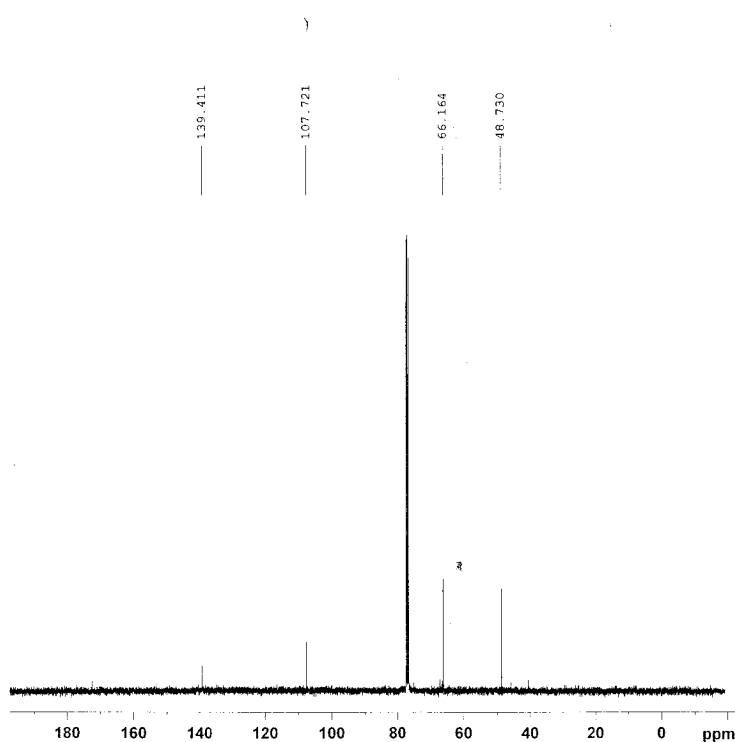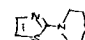

SKV-9/03/10-17

```
Current Data Parameters
NAME      Sanjeev Verma
EXPNO    19
PROCNO   1

F2 - Acquisition Parameters
Date_    20100205
Time     17.11
INSTRUM  avco
PROBHD   5 mm PABBO BB-
PULPROG  zgpg30
TD       65536
SOLVENT  CDCl3
NS       16
DS       4
SWH      73980.814 Hz
FIDRES   0.360918 Hz
AQ       1.3664756 sec
RG       43768
DW       70.850 usec
DE       6.00 usec
TE       295.3 K
D1       2.0000000 sec
d11      0.0300000 sec
DELTA    1.8699999 sec
CDE      1

===== CHANNEL f1 =====
NUC1     13C
P1       9.10 usec
PL1     -1.50 dB
SFO1    100.6210298 MHz

===== CHANNEL f2 =====
CDEPRG1  waltz16
NUC2     1H
PCPR2    13
SFO2     400.1300035 MHz
P12      89.00 usec
PL12     0.50 dB
PL13     16.00 dB
PL14     17.00 dB
SFO2     400.1316205 MHz

F2 - Processing parameters
SI       32768
SF      100.6177496 MHz
WDW      EM
SSB      0
LB       1.00 Hz
GB       0
PC       1.40
```

### <sup>1</sup>H NMR of 2-Morpholin-4-yl-1H-benzimidazole (CDCl<sub>3</sub>)

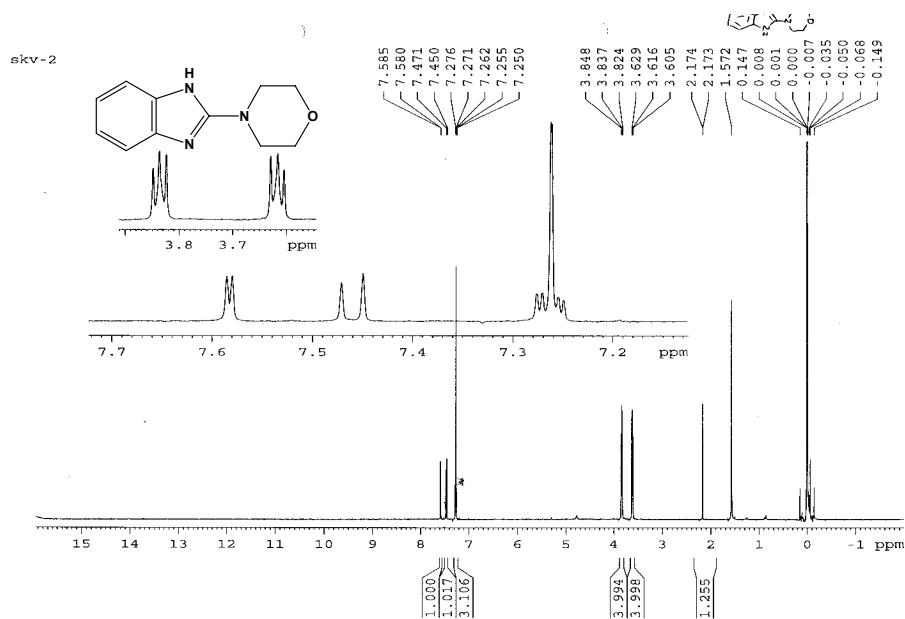

### <sup>13</sup>C NMR of 2-Morpholin-4-yl-1H-benzimidazole (CDCl<sub>3</sub>)

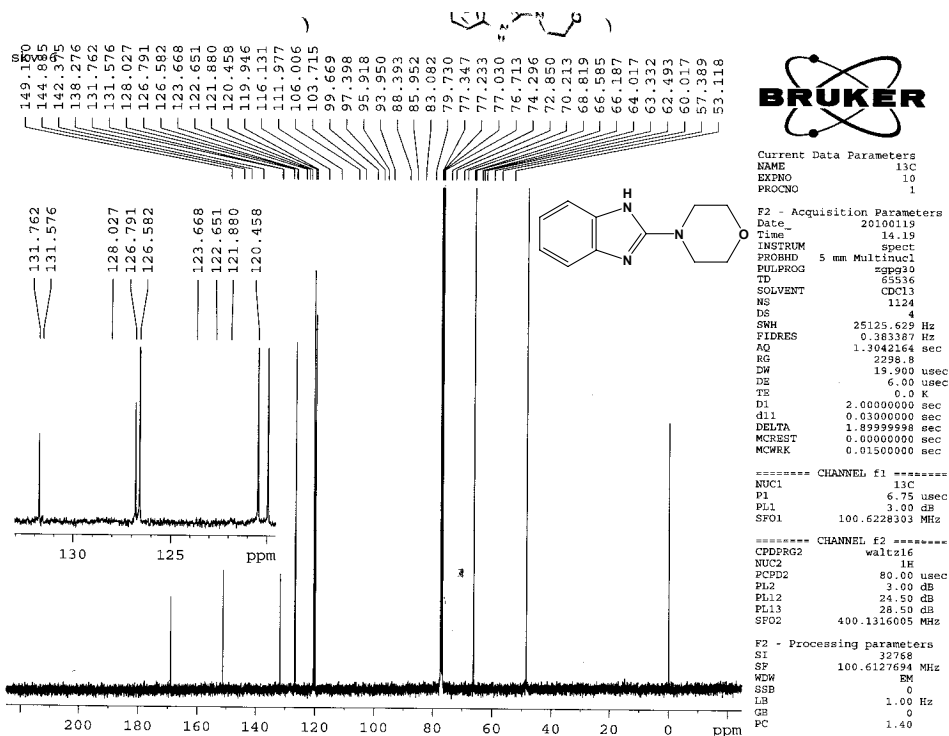

### <sup>1</sup>H NMR of Benzothiazol-2-yl-benzyl-amine (CDCl<sub>3</sub>)

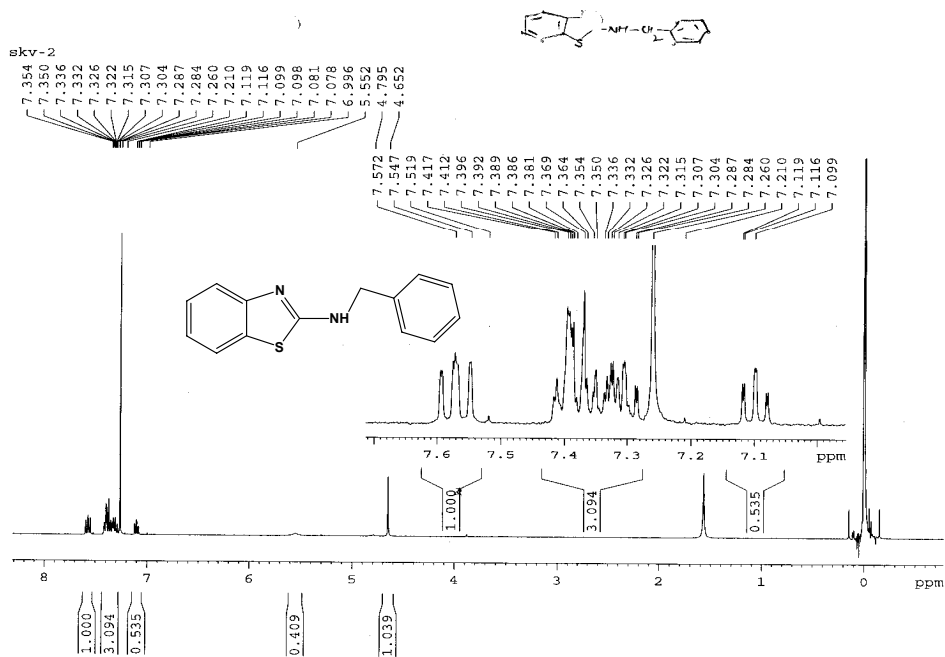

### <sup>13</sup>C NMR of Benzothiazol-2-yl-benzyl-amine (CDCl<sub>3</sub>)

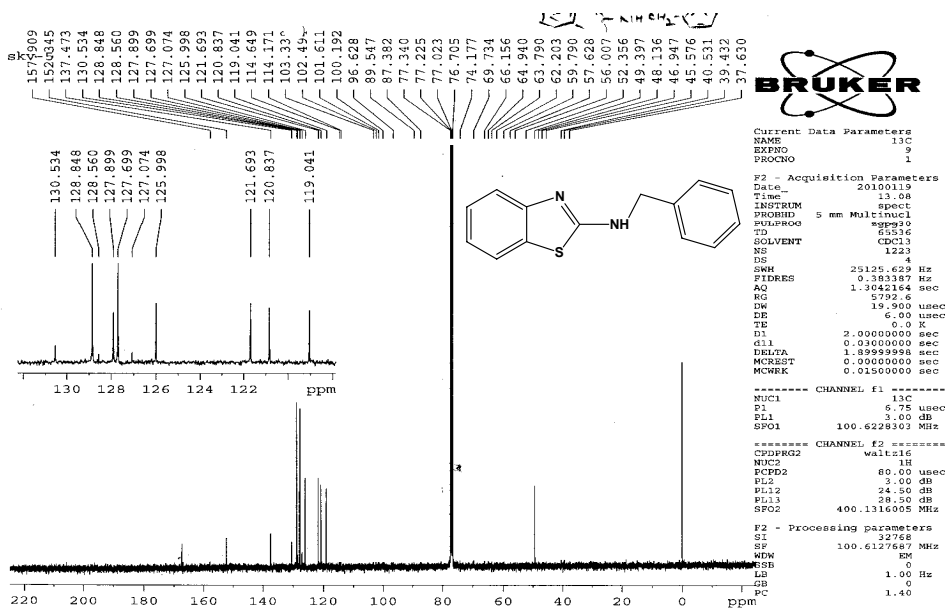

<sup>1</sup>H NMR of (4-Amino-benzyl)-benzothiazol-2-yl-amine (DMSO-d<sup>6</sup>)

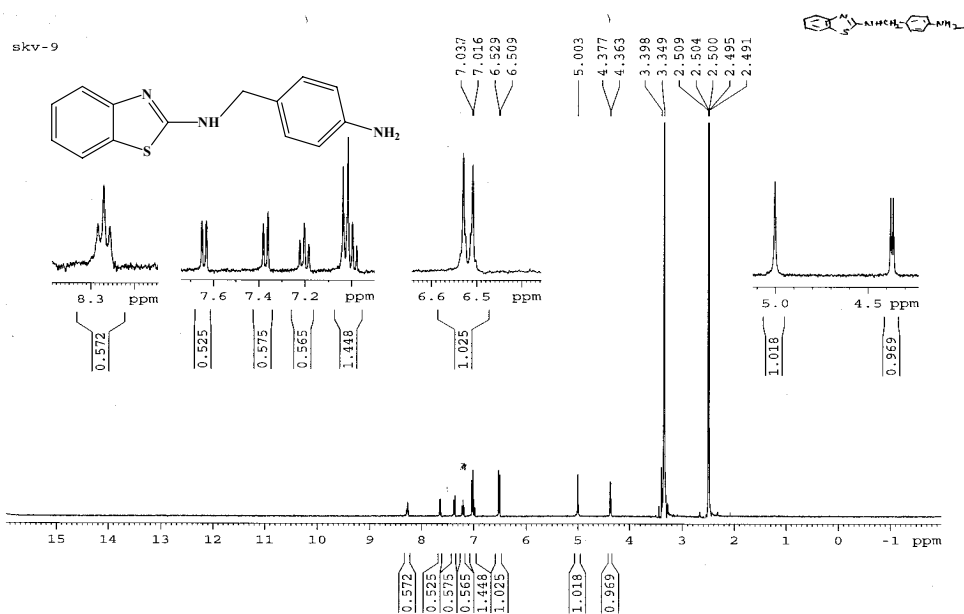

<sup>13</sup>C NMR of (4-Amino-benzyl)-benzothiazol-2-yl-amine (DMSO-d<sup>6</sup>)

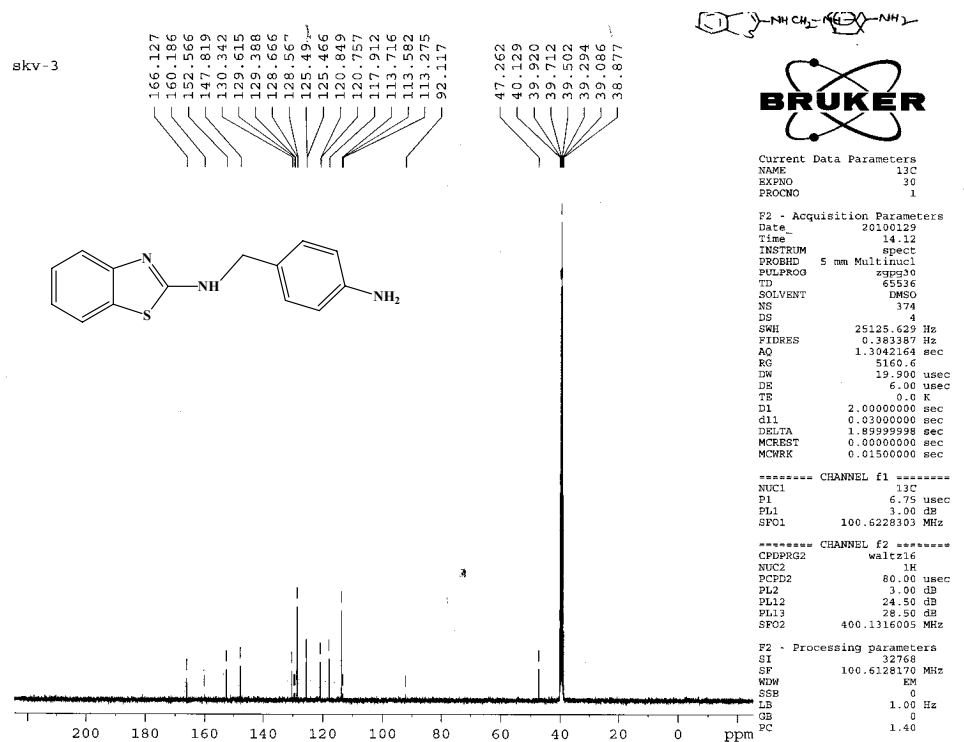



**<sup>1</sup>H NMR of 2-Piperazin-1-yl-benzothiazole (CDCl<sub>3</sub>)**

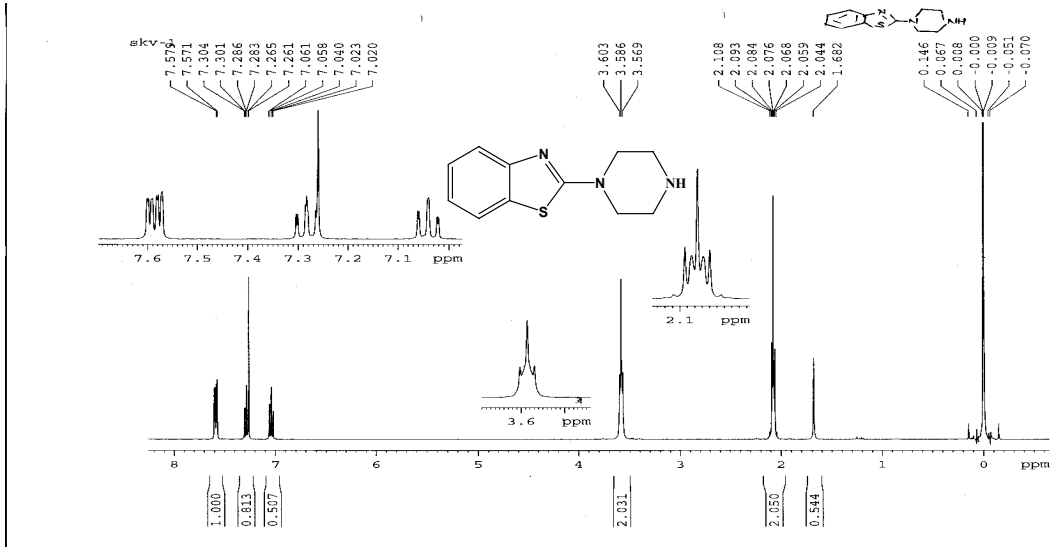

**<sup>13</sup>C NMR of 2-Piperazin-1-yl-benzothiazole (CDCl<sub>3</sub>)**

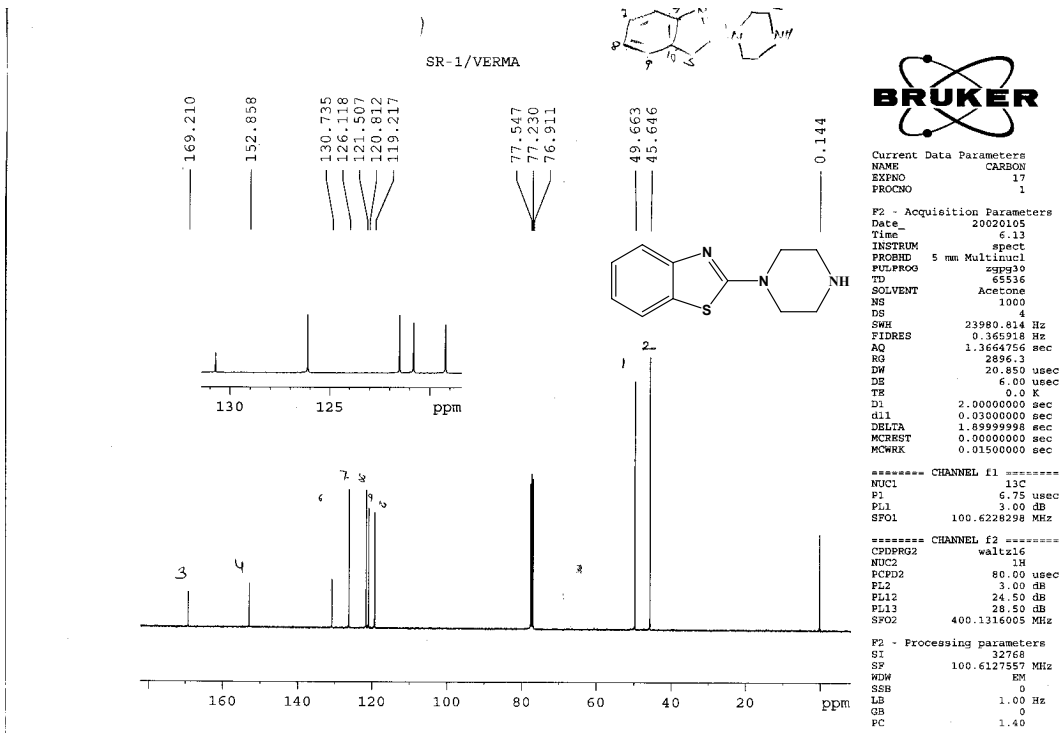

**<sup>1</sup>H NMR of 6-Chloro-2-piperazin-1-yl-benzothiazole (CDCl<sub>3</sub>)**

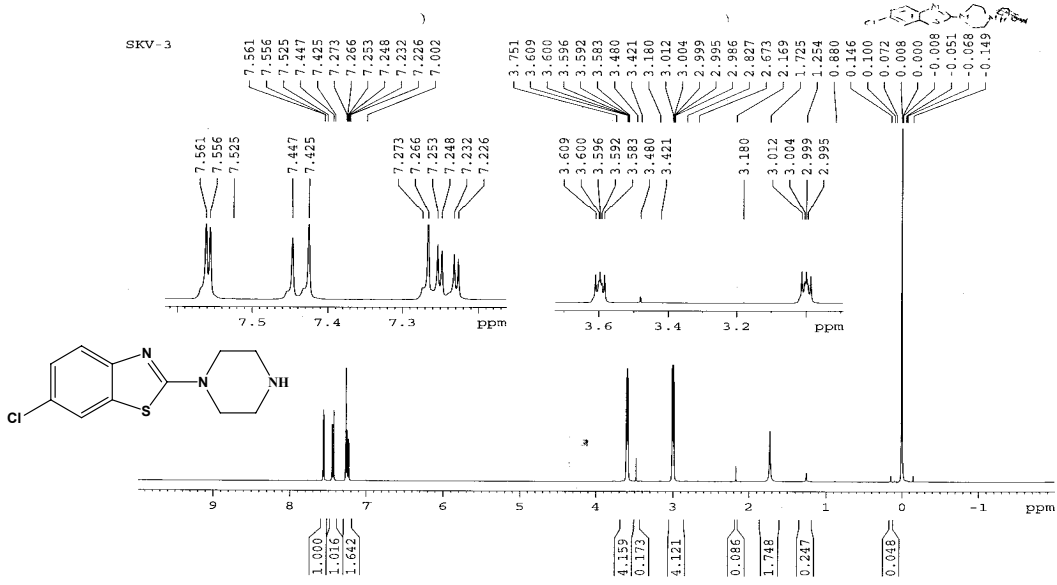

**<sup>13</sup>C NMR of 6-Chloro-2-piperazin-1-yl-benzothiazole (CDCl<sub>3</sub>)**

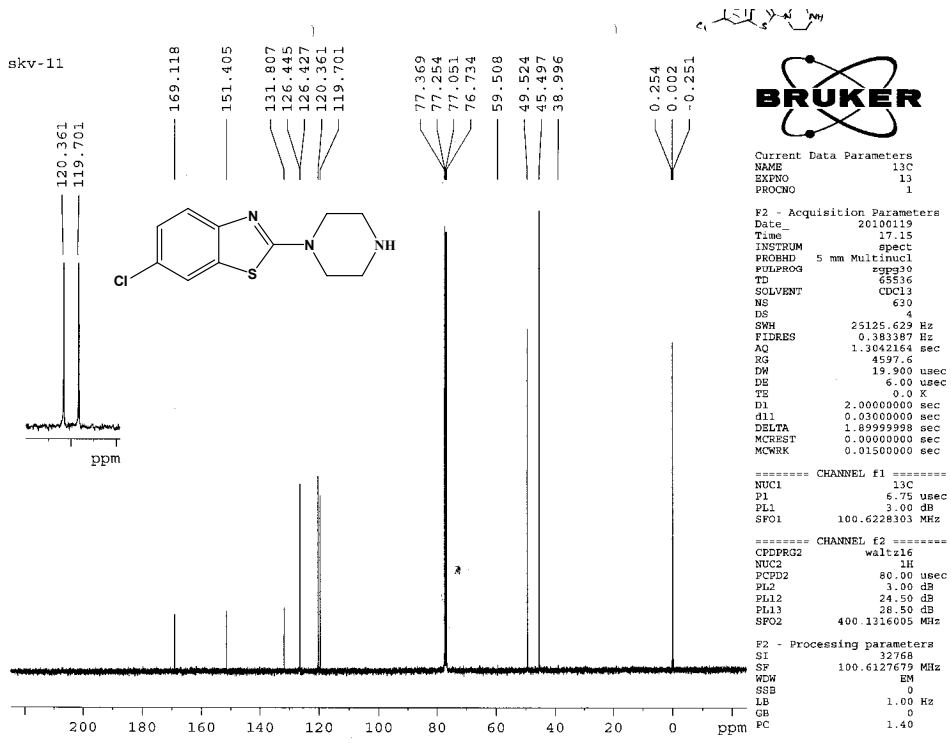

<sup>1</sup>H NMR of 2-Piperazin-1-yl-1H-benzimidazole (DMSO-d<sub>6</sub>)

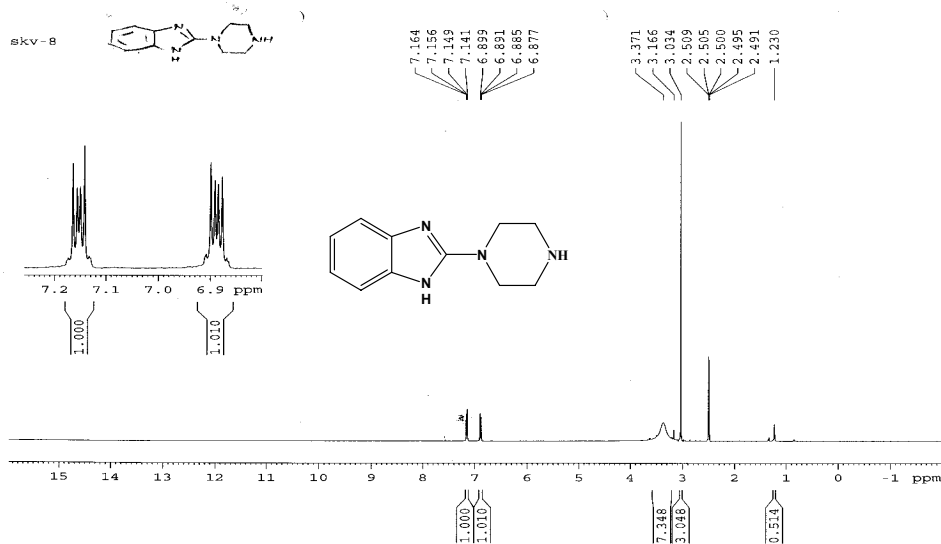

<sup>13</sup>C NMR of 2-Piperazin-1-yl-1H-benzimidazole (DMSO-d<sub>6</sub>)

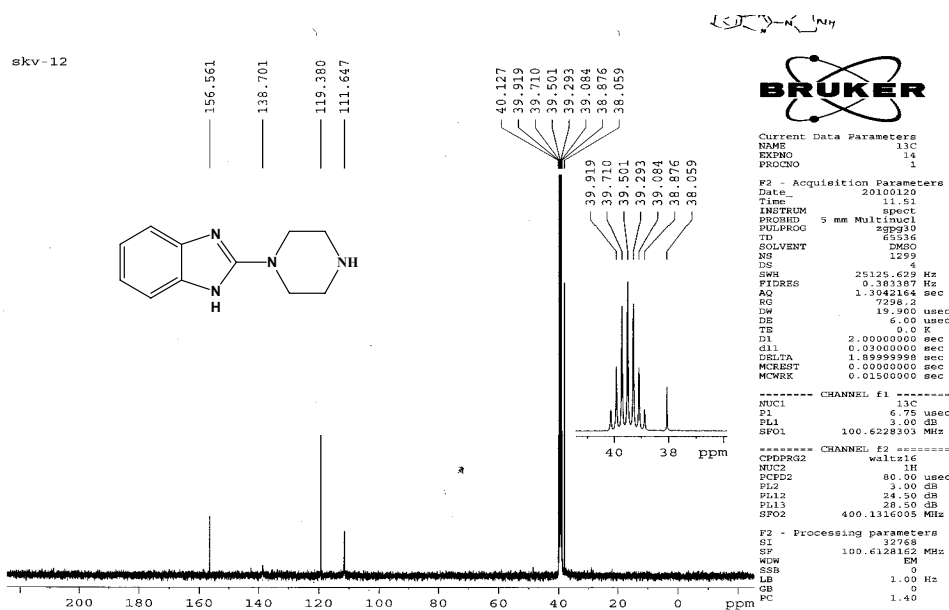

### <sup>1</sup>H NMR of 1-Thiazol-2-yl-piperazine (CDCl<sub>3</sub>)

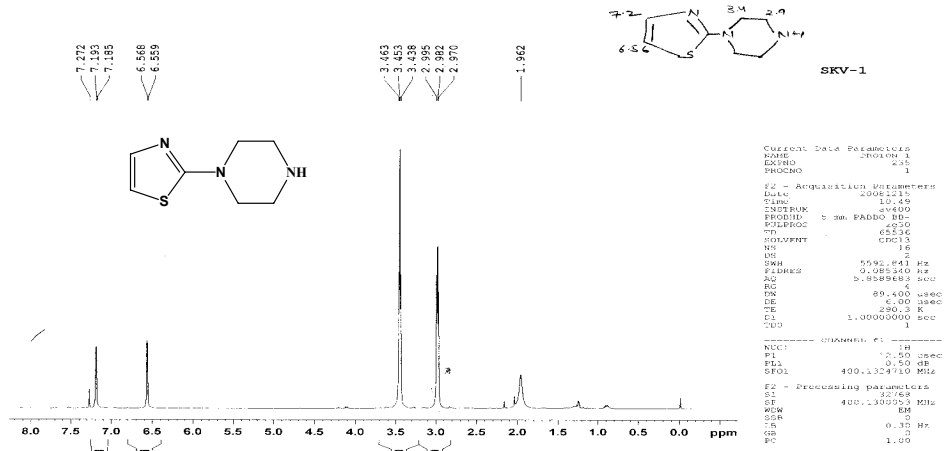

### <sup>13</sup>C NMR of 1-Thiazol-2-yl-piperazine (CDCl<sub>3</sub>)

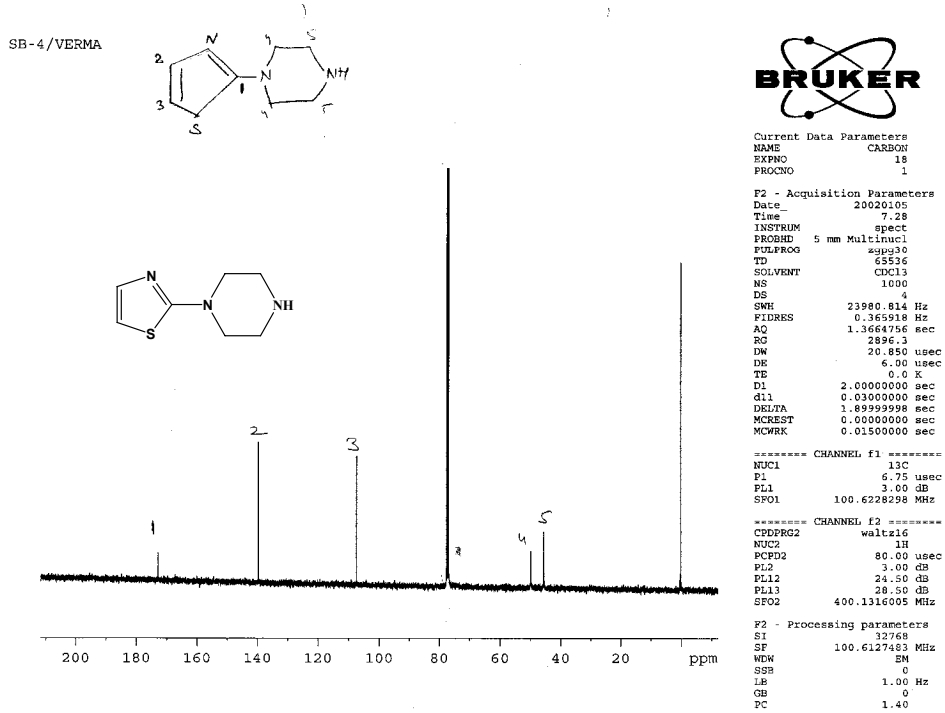

Supplement: c0ob00859a.pdf [file c0ob00859a.pdf]
